# Supplementary material for: High-Throughput Screening to Identify Inhibitors of Plasmodium falciparum Importin α
Source: MDPI journal article supplement (doi:10.3390/cells11071201), 2022-04-02
Supplement: s1 [file s1]

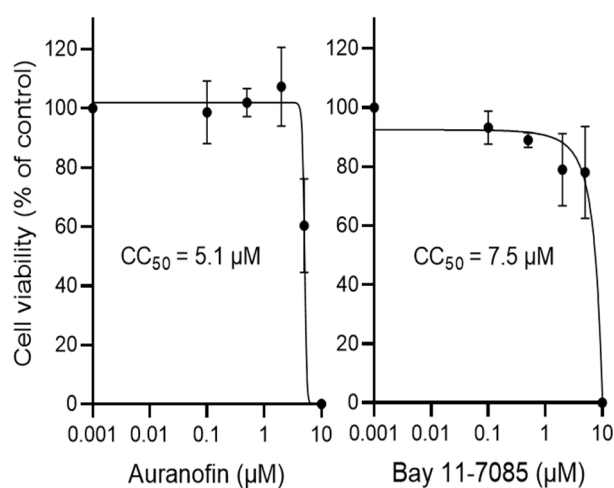

**Figure S1.** Low toxicity of auranofin and Bay 11-7085 in HFF cells. Freshly confluent HFF cells were treated with increasing concentrations of auranofin and Bay 11-7085 as indicated for 48 h followed by an MTT assay, performed as described in the Materials and Methods section. Results represent the mean  $\pm$  SD for duplicate wells from a single assay, representative of 2 independent experiments (see Table S1 for pooled data).

**Table S1:** Summary of IC<sub>50</sub>, CC<sub>50</sub> and Selectivity Index data for auranofin and Bay 11-7085 in *T. gondii* tachyzoites/HFF host cells.

| Compound      | IC <sub>50</sub> (μM) * | CC <sub>50</sub> (μM) ** | S/I |
|---------------|-------------------------|--------------------------|-----|
| Bay 11-7085   | 2.7 $\pm$ 1.2           | 8.2 $\pm$ 0.7            | 3   |
| auranofin     | 2.3 $\pm$ 1.4           | 5.1 $\pm$ 0.0            | 2.2 |
| pyrimethamine | 0.5 $\pm$ 0.1           | >> 10 μM                 | 22  |

\* Results represent the mean  $\pm$  SEM ( $n = 3$ ) from experiments as per Figure 7; \*\* Results represent the mean  $\pm$  SD ( $n = 2$ ) from experiments as per Figure S1.
